# Supplementary material for: Characterisation of Aberrant Metabolic Pathways in Hepatoblastoma Using Liquid Chromatography and Tandem Mass Spectrometry (LC-MS/MS)
Source: MDPI journal article supplement (doi:10.3390/cancers15215182), 2023-10-28

Chromatograms for the paper submitted to MDPI cancers

**Characterisation of aberrant metabolic pathways in hepatoblastoma using liquid chromatography and tandem mass spectrometry (LC-MS/MS)**

Alison Whitby\*, Pardeep Pabla\*, Bhoomi Shastri, Laudina Amugi, Álvaro Del Río-Álvarez, Dong-Hyun Kim, Laura Royo, Carolina Armengol, and Madhumita Dandapani.

## Total Ion Chromatograms (posneg)

Untargeted metabolomics (ZIC-pHILIC 15 minute method)

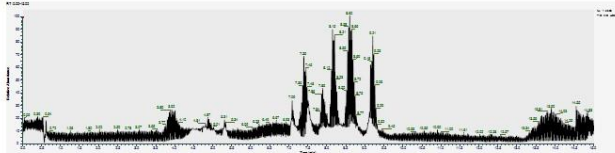

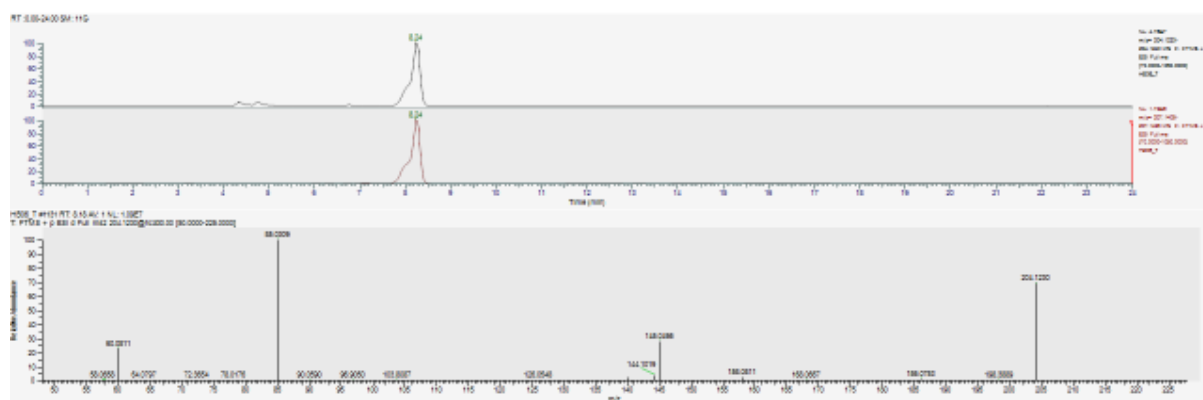

Hydroxybutyrylcarnitine  
(using the acetylcarnitine IS for quantification)

Top: Metabolite in sample HB06\_T  
Bottom: Internal standard (IS) of acetylcarnitine in HB06\_T

MS/MS of metabolite in HB06\_T

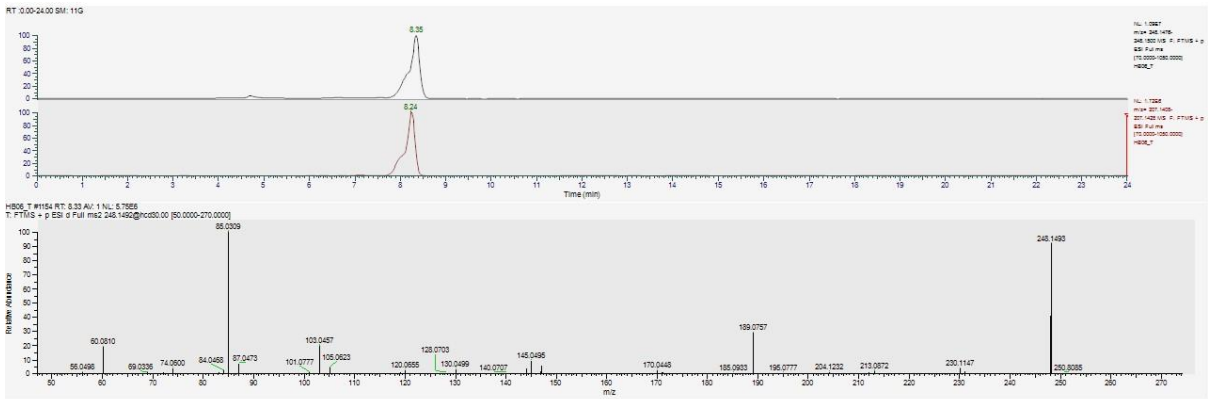

Leucine at 8.43 min, isoleucine at 8.73 min

Top: Metabolites in sample HB06\_T  
Bottom: Internal standards (IS) in HB06\_T

MS/MS of metabolite in HB06\_T

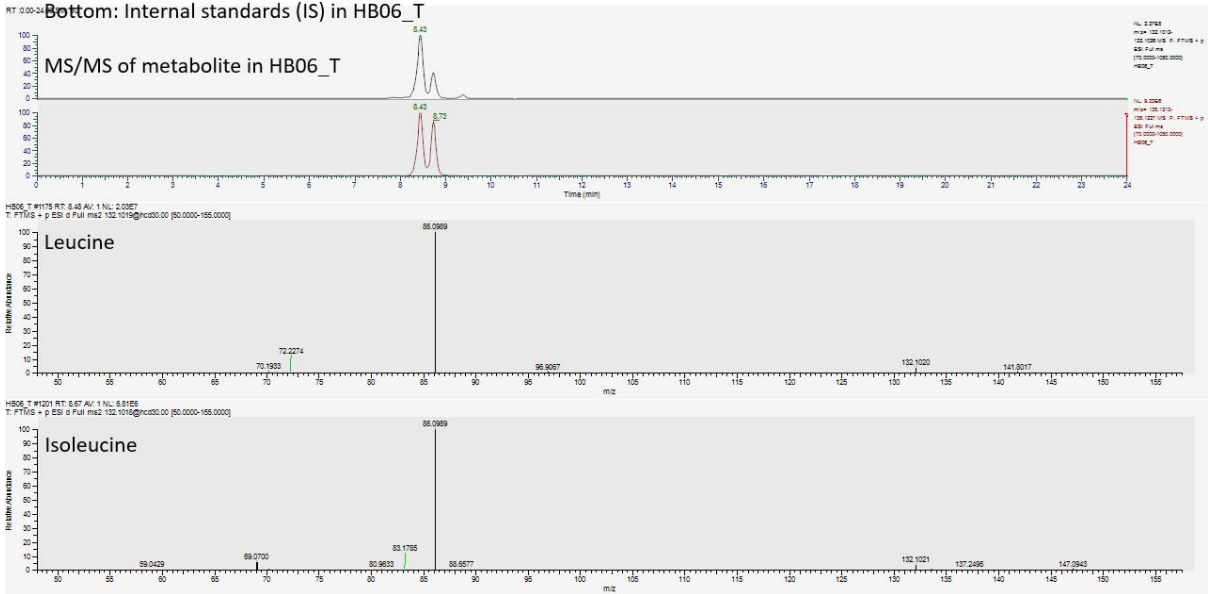

## Valine

Top: Metabolite in sample HB06\_T

Middle: Internal standard (IS) in HB06\_T

Bottom: Standard of valine in calibration curve level 5

MS/MS of metabolite in HB06\_T

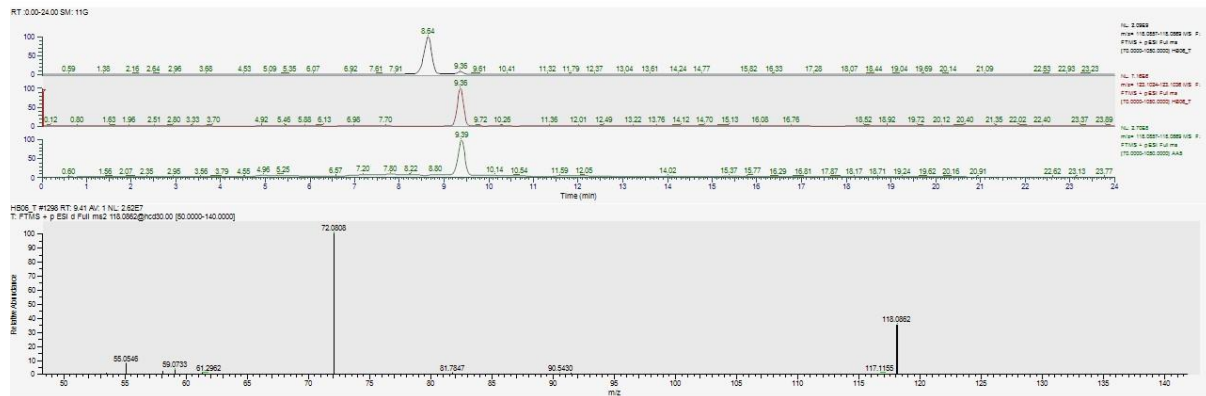

## Alanine

Top: Metabolite in sample HB06\_T

Bottom: Standard of alanine in calibration curve level 5

(Valine IS was used)

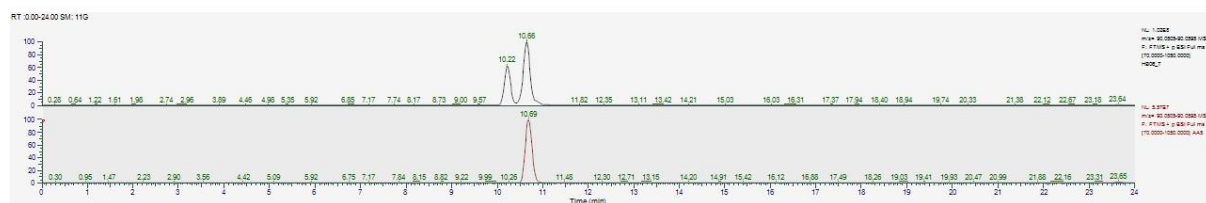

## Glycine

Top: Metabolite in sample HB06\_T

Bottom: Standard of glycine in calibration curve level 5  
(Valine IS was used)

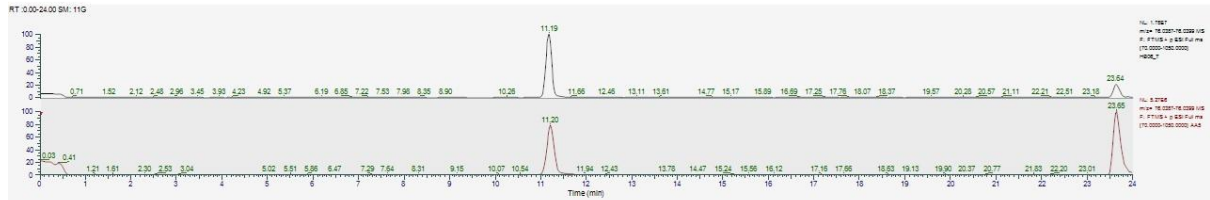

## Aspartate

Top: Metabolite in sample HB06\_T

Bottom: Standard of aspartate in calibration curve level 5  
(Valine IS was used)

MS/MS of metabolite in HB06\_T

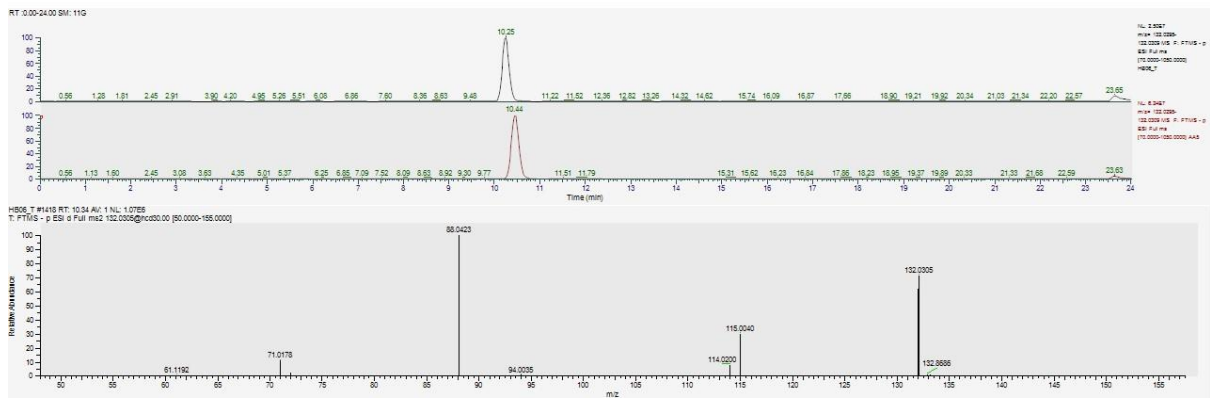

### C18

Isobutyrylcarnitine at 4.39 min, butyrylcarnitine (O-butanoylcarnitine) at 4.48 min

Top: Metabolites in sample HB06\_T

Bottom: Internal standard (IS) of D3-butyrylcarnitine in HB06\_T

MS/MS of butyrylcarnitine metabolite in HB06\_T

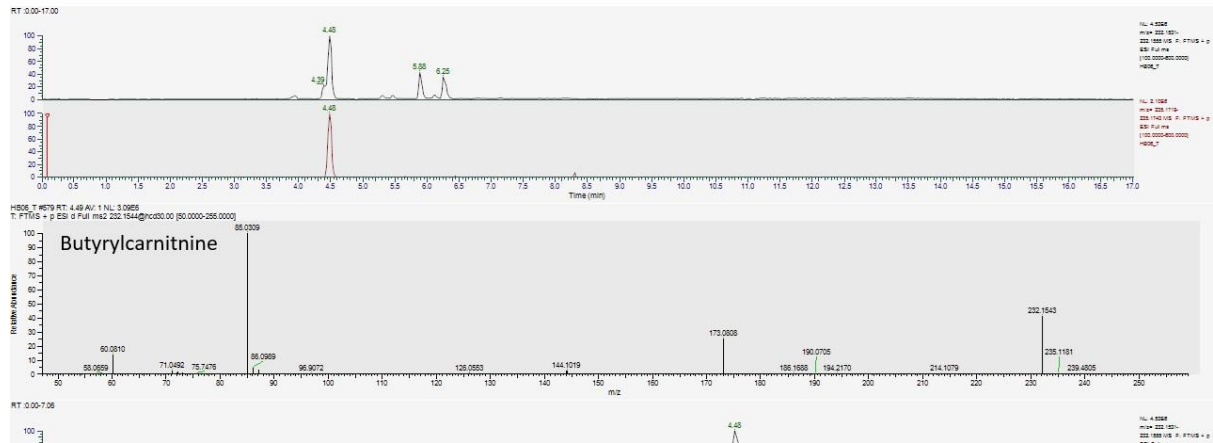

### Propionylcarnitine

Top: Metabolite in sample HB06\_T

Bottom: Internal standard (IS) in HB06\_T

MS/MS of metabolite in HB06\_T

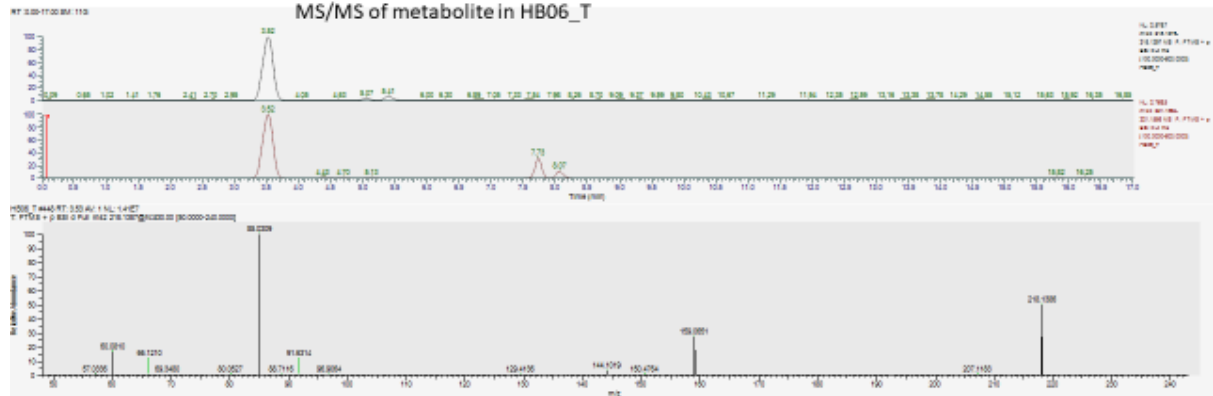

2-Methylbutyrylcarnitine at 5.27 min, isovalerylcarnitine at 5.47 min

Top: Total of isovalerylcarnitine and 2-methylbutyrylcarnitine metabolites as entire smoothed peak in sample HB06\_T

Middle: Metabolites in sample HB06\_T

Bottom: Internal standard (IS) of D9-C5-Isovalerylcarnitine in HB06\_T

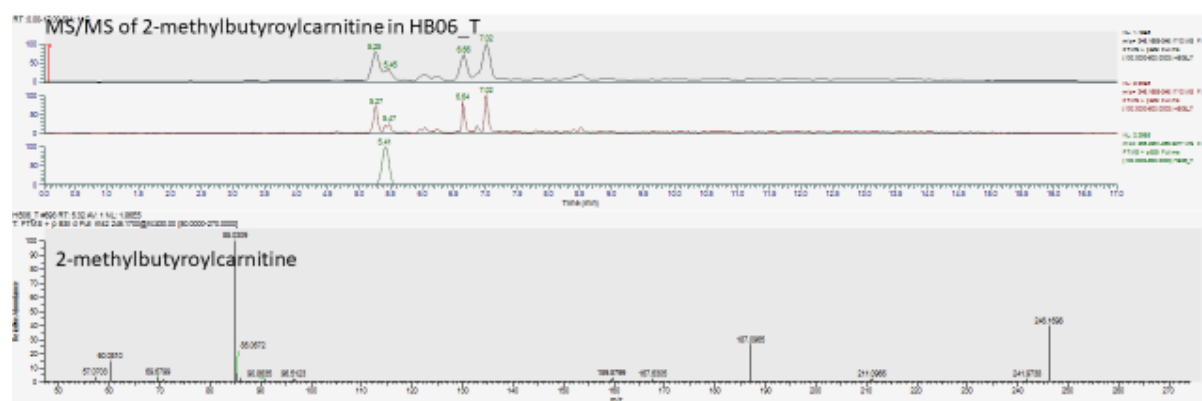

Supplement: s1 [file s1]
