# Supplementary material for: Characterisation of Aberrant Metabolic Pathways in Hepatoblastoma Using Liquid Chromatography and Tandem Mass Spectrometry (LC-MS/MS)
Source: MDPI journal article supplement (doi:10.3390/cancers15215182), 2023-10-28
Supplement: s1 [file s1]

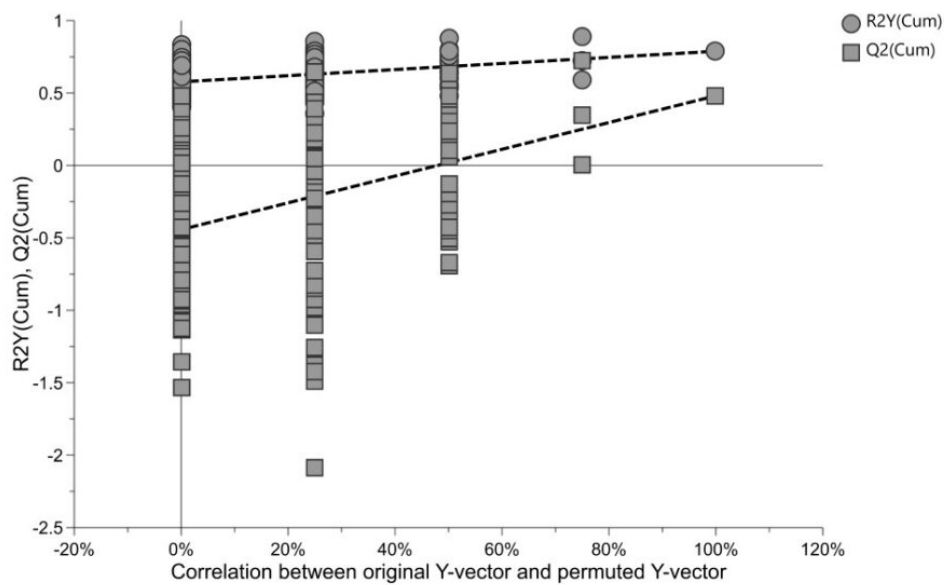

Figure S1: Permutation test of OPLS-DA model shown in Figure 1b.

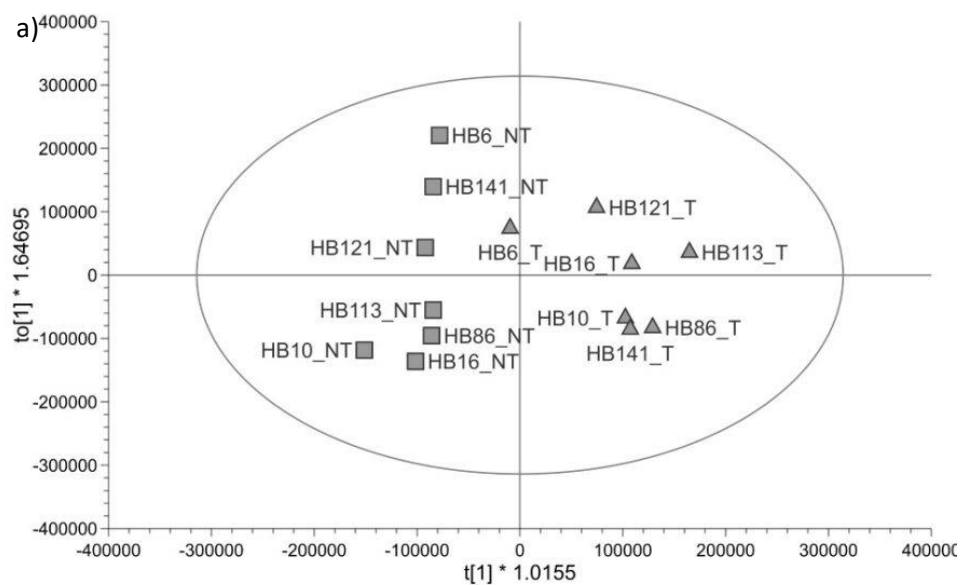

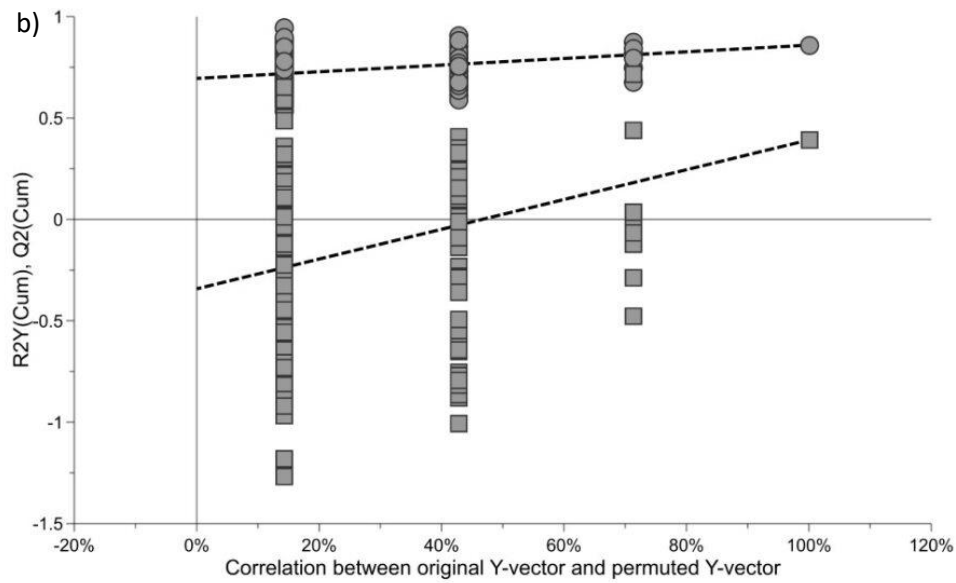

Figure S2: a) OPLS-DA scores plot showing hepatoblastoma ▲ and healthy liver ■ paired samples from paediatric patients omitting patient HB83 ( $R^2Y$  0.859,  $Q^2$  0.392). b) Permutation test of the model.

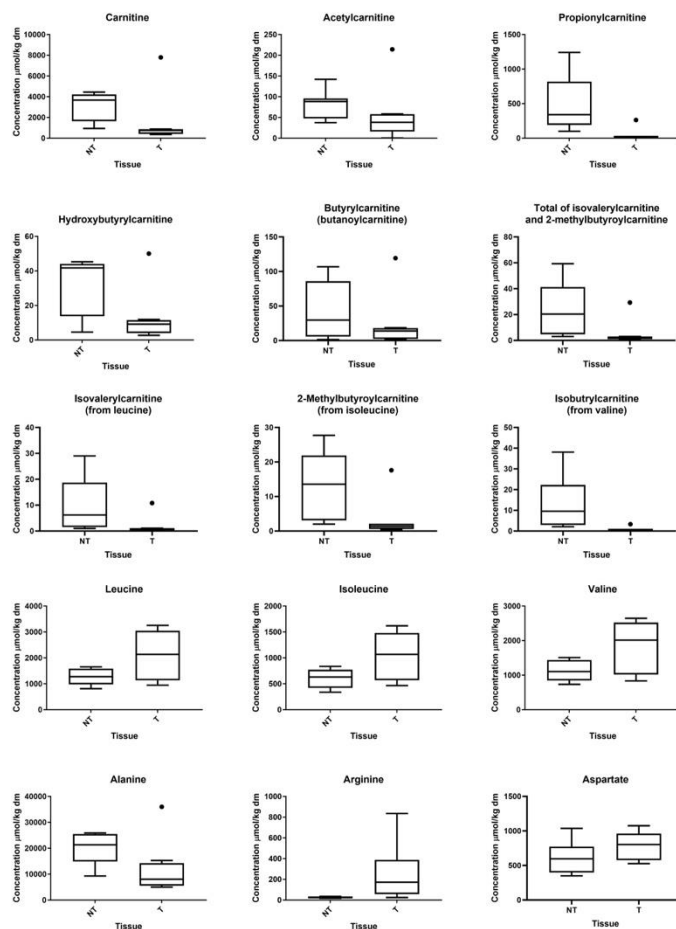

Figure S3: Box and whisker plots with Tukey's whiskers showing HB83\_T is an outlier in targeted metabolomics in the case of multiple metabolites, thereby allowing us to remove patient HB83 from our analysis.

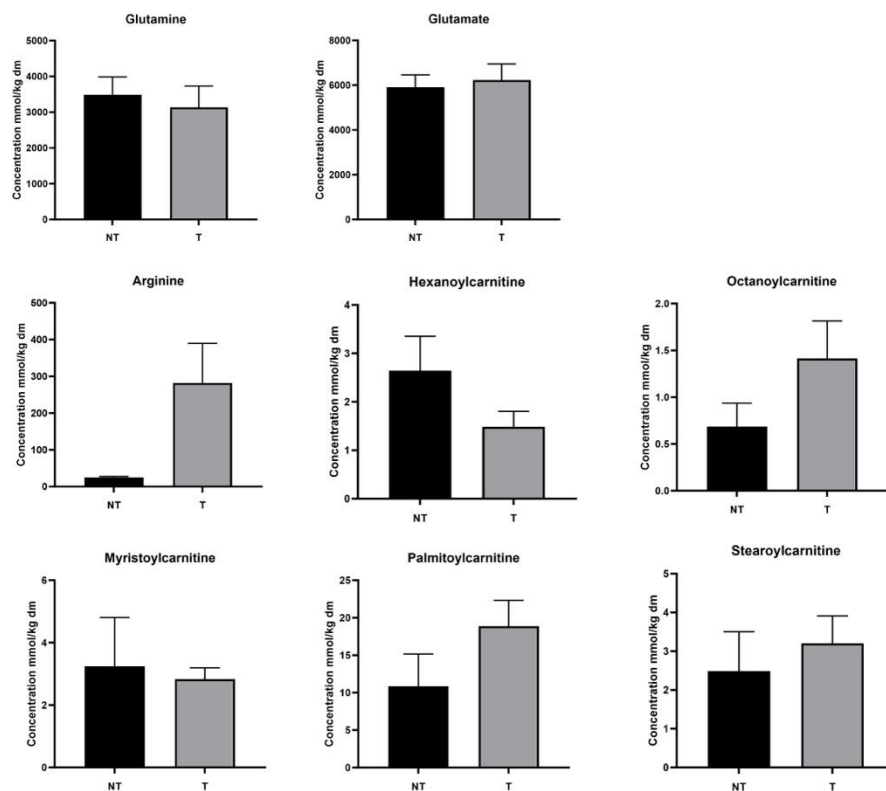

Figure S4: Amino acids and acylcarnitines concentrations in hepatoblastoma (T) and paired healthy liver tissue (NT). Values are means  $\pm$  standard deviation; (n = 7 paired samples) None were significant.

Table S1: Summary of metabolic pathway analysis with Metaboanalyst ([www.metaboanalyst.ca](http://www.metaboanalyst.ca)) of the statistically significant metabolites identified by untargeted metabolomics.

| Pathway Name                                | Match Status | p        | -log(p) | Holm p  | FDR    | Impact | Details           |
|---------------------------------------------|--------------|----------|---------|---------|--------|--------|-------------------|
| Alanine, aspartate and glutamate metabolism | 5/12         | 0.014506 | 1.8385  | 0.85584 | 0.5812 | 0.3109 | KEGG SMP SMP S MP |
| Nitrogen metabolism                         | 2/2          | 0.019702 | 1.7055  | 1       | 0.5812 | 0      | KEGG SMP          |

|                                                |     |              |             |   |            |             |          |
|------------------------------------------------|-----|--------------|-------------|---|------------|-------------|----------|
| <b>D-Glutamine and D-glutamate metabolism</b>  | 2/3 | 0.05401      | 1.2675      | 1 | 0.832<br>4 | 0.5         | KEGG SMP |
| <b>Glyoxylate and dicarboxylate metabolism</b> | 3/7 | 0.0608       | 1.2161      | 1 | 0.832<br>4 | 0.0317<br>5 | KEGG     |
| <b>Butanoate metabolism</b>                    | 2/4 | 0.09875<br>9 | 1.0054      | 1 | 0.832<br>4 | 0           | KEGG SMP |
| <b>Glutathione metabolism</b>                  | 2/4 | 0.09875<br>9 | 1.0054      | 1 | 0.832<br>4 | 0.0267<br>5 | KEGG SMP |
| <b>Citrate cycle (TCA cycle)</b>               | 2/4 | 0.09875<br>9 | 1.0054      | 1 | 0.832<br>4 | 0.1231<br>1 | KEGG SMP |
| <b>Selenocompound metabolism</b>               | 1/1 | 0.14407      | 0.8414<br>3 | 1 | 0.85       | 0           | KEGG SMP |
| <b>Ether lipid metabolism</b>                  | 1/1 | 0.14407      | 0.8414<br>3 | 1 | 0.85       | 0           | KEGG     |
| <b>Propanoate metabolism</b>                   | 1/1 | 0.14407      | 0.8414<br>3 | 1 | 0.85       | 0           | KEGG SMP |
| <b>Lysine degradation</b>                      | 2/6 | 0.20675      | 0.6845<br>6 | 1 | 1          | 0.1455<br>4 | KEGG SMP |
| <b>Pyrimidine metabolism</b>                   | 2/7 | 0.26512      | 0.5765<br>5 | 1 | 1          | 0.0158<br>4 | KEGG SMP |

|                                               |      |         |         |   |   |          |              |
|-----------------------------------------------|------|---------|---------|---|---|----------|--------------|
| <b>Arginine biosynthesis</b>                  | 2/7  | 0.26512 | 0.57655 | 1 | 1 | 0.11675  | KEGG         |
| <b>Glycerolipid metabolism</b>                | 1/2  | 0.26843 | 0.57116 | 1 | 1 | 0.04361  | KEGG SMP     |
| <b>Nicotinate and nicotinamide metabolism</b> | 1/2  | 0.26843 | 0.57116 | 1 | 1 | 0.1943   | KEGG SMP     |
| <b>Glycerophospholipid metabolism</b>         | 2/8  | 0.32403 | 0.48942 | 1 | 1 | 0.12907  | KEGG         |
| <b>Aminoacyl-tRNA biosynthesis</b>            | 3/15 | 0.36987 | 0.43195 | 1 | 1 | 0        | KEGG         |
| <b>Purine metabolism</b>                      | 3/15 | 0.36987 | 0.43195 | 1 | 1 | 0.01451  | KEGG SMP     |
| <b>Porphyrin and chlorophyll metabolism</b>   | 1/3  | 0.37565 | 0.42522 | 1 | 1 | 0        | KEGG         |
| <b>Glycolysis / Gluconeogenesis</b>           | 1/3  | 0.37565 | 0.42522 | 1 | 1 | 2.10E-04 | KEGG SMP SMP |

Table S2: Table of results from the analysis of metabolic pathways using GSEA (Gene Set Enrichment Analysis) confirmed the dysregulation of these specific pathways (FDR<0.25) in HB as compared to NT tissues

| Gene Set                                         | Enrichment Score (ES) | Normalized Enrichment Score (NES) | Nominal p-value | FDR q-value  | FWER p-Value |
|--------------------------------------------------|-----------------------|-----------------------------------|-----------------|--------------|--------------|
| WP_ALANINE_AND_ASPARTATE_METABOLISM              | -<br>0.90693<br>47    | -<br>1.79820<br>53                | 0               | 0            | 0            |
| KEGG_BETA_ALANINE_METABOLISM                     | -<br>0.87722<br>74    | -<br>1.99104<br>81                | 0               | 0            | 0            |
| KEGG_ALANINE_ASPARTATE_AND_GLUTAMATE_METABOLISM  | -<br>0.71576<br>357   | -<br>2.01453<br>1                 | 0.001<br>908    | 0.001<br>908 | 0.001        |
| GOBP_ALPHA_AMINO_ACID_CATABOLIC_PROCESS          | -<br>0.76589<br>84    | -<br>2.00925<br>47                | 0.003<br>883    | 0.003<br>883 | 0.002        |
| GOBP_BRANCHED_CHAIN_AMINO_ACID_CATABOLIC_PROCESS | -<br>0.88882<br>774   | -<br>1.68914<br>09                | 0.009<br>921    | 0.009<br>921 | 0.005        |
| GOBP_AMINO_ACID_CATABOLIC_PROCESSES              | -<br>0.78353<br>465   | -<br>2.00170<br>87                | 0.002<br>053    | 0.002<br>053 | 0.001        |
| REACTOME_TRANSPORT_OF_FATTY_ACIDS                | -<br>0.43739<br>185   | -<br>0.91982<br>87                | 0.564<br>007    | 0.564<br>007 | 0.304        |
| GOBP_POSITIVE_REGULATION_OF_FATTY_ACID_TRANSPORT | -<br>0.41594<br>616   | -<br>1.32859<br>29                | 0.108<br>607    | 0.108<br>607 | 0.053        |
| GOBP_NEGATIVE_REGULATION_OF_FATTY_ACID_TRANSPORT | -<br>0.75177<br>634   | -<br>1.56687<br>06                | 0.021<br>739    | 0.021<br>739 | 0.011        |
| GOBP_FATTY_ACID_TRANSPORT                        | -<br>0.42737<br>868   | -<br>1.71218<br>41                | 0.006<br>061    | 0.006<br>061 | 0.003        |
| KEGG_GLUTATHIONE_METABOLISM                      | -<br>0.56139<br>565   | -<br>1.65766<br>38                | 0.037<br>422    | 0.037<br>422 | 0.018        |
| GOBP_GLUTATHIONE_METABOLIC_PROCESS               | -<br>0.63098<br>53    | -<br>1.90510<br>76                | 0.008<br>048    | 0.008<br>048 | 0.004        |
| GOBP_GLUTATHIONE_CATABOLIC_PROCESSES             | -<br>0.26168<br>445   | -<br>0.61140<br>496               | 0.907<br>975    | 0.907<br>975 | 0.444        |
| HALLMARK_GLYCOLYSIS                              | -<br>0.41626<br>13    | -<br>1.51795<br>7                 | 0.07            | 0.07         | 0.035        |
| REACTOME_GLYCOLYSIS                              | -<br>0.39208<br>227   | -<br>1.27930<br>45                | 0.225<br>352    | 0.225<br>352 | 0.112        |

|                                                                 |                     |                    |              |              |       |
|-----------------------------------------------------------------|---------------------|--------------------|--------------|--------------|-------|
| KEGG_GLYCOLYSIS_GLUONEOGENESIS                                  | -<br>0.66981<br>17  | -<br>1.92805<br>65 | 0.001<br>898 | 0.001<br>898 | 0.001 |
| REACTOME_CITRIC_ACID_CYCLE_TCA_CYCLE                            | -<br>0.75022<br>274 | -<br>1.69409<br>33 | 0.019<br>92  | 0.019<br>92  | 0.01  |
| REACTOME_PYRUVATE_METABOLISM_AND_CITRIC_ACID_TCA_CYCLE          | -<br>0.65357<br>37  | -<br>1.93337<br>89 | 0.008<br>23  | 0.008<br>23  | 0.004 |
| KEGG_CITRATE_CYCLE_TCA_CYCLE                                    | -<br>0.75444<br>055 | -<br>1.65578<br>47 | 0.032<br>692 | 0.032<br>692 | 0.017 |
| GOBP_INOSINE_METABOLIC_PROCESS                                  | -<br>0.71015<br>054 | -<br>1.29903<br>54 | 0.184<br>265 | 0.184<br>265 | 0.089 |
| KEGG_NICOTINATE_AND_NICOTINAMIDE_METABOLISM                     | -<br>0.56647<br>474 | -<br>1.61305<br>09 | 0.022<br>133 | 0.022<br>133 | 0.011 |
| GOBP_NAD_BIOSYNTHESIS_VIA_NICOTINAMIDE_RIBOSIDE_SALVAGE_PATHWAY | -<br>0.79406<br>12  | -<br>1.80060<br>79 | 0.003<br>831 | 0.003<br>831 | 0.002 |

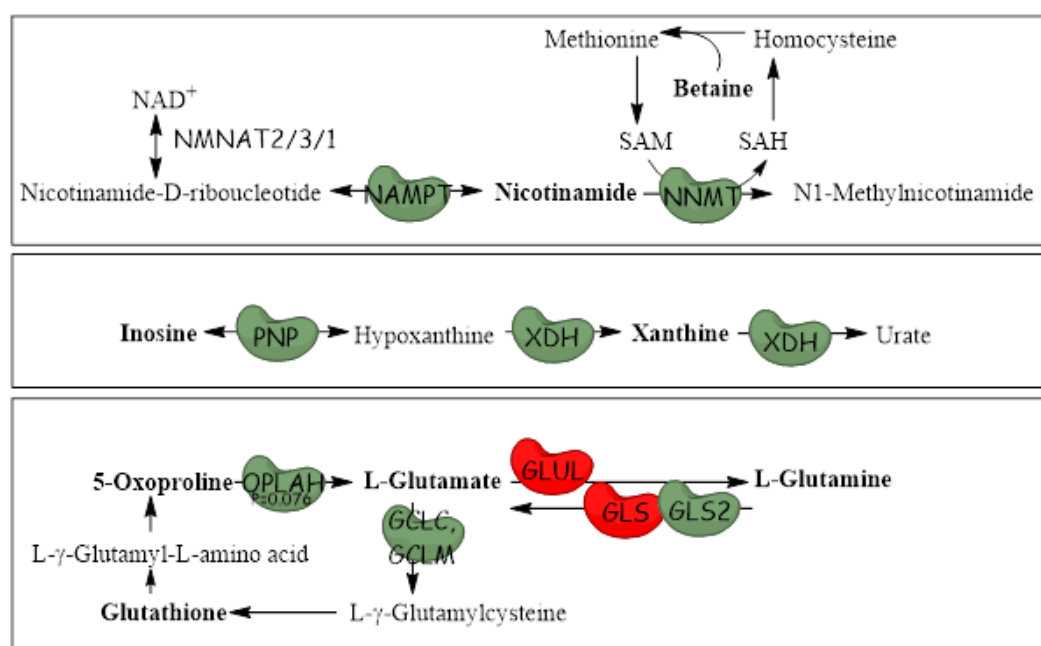

Figure S5: Aberrant metabolic pathways in HB compared to in healthy liver, according to untargeted metabolomics and transcriptomics analyses. Metabolites in bold are significantly decreased in abundance in HB, green genes are significantly decreased and red genes significantly increased in expression in HB.
